# Supplementary material for: Universal consistency of twin support vector machines
Source: Springer Nature journal article supplement (doi:10.1007/s13042-021-01281-0), 2021-03-14
Supplement: MOESM1 [file 18964044]

# Supplementary Material of "Universal Consistency of Twin Support Vector Machines"

Weixia Xu · Dingjiang Huang · Shuigeng Zhou

the date of receipt and acceptance should be inserted later

## 1 Proofs of Lemmas and Theorems

### 1.1 Proof of Theorem 1

*Proof* By the definition of infimum, there exists  $f_{1,\varepsilon} \in H$  such that

$$R_{1,P,c_1}^{reg}(f_{1,\varepsilon}) \leq \inf_{f_1 \in H} R_{1,P,c_1}^{reg}(f_1) + \varepsilon$$

for any  $\varepsilon \in (0, L_1(1, 0, \lambda_1) + L_1(-1, 0, \lambda_1)]$ . Note the value  $L_1(1, 0, \lambda_1) + L_1(-1, 0, \lambda_1)$  is an upper bound with  $f_1 = 0$  for the loss function  $L_1$ , since it measures the largest distance between  $y$  and  $f_1(x)$ . Thus,

$$\begin{aligned} \Omega(c_1, \|f_{1,\varepsilon}\|_H) &\leq R_{1,P,c_1}^{reg}(f_{1,\varepsilon}) \leq \inf_{f_1 \in H} R_{1,P,c_1}^{reg}(f_1) + \varepsilon \leq R_{1,P,c_1}^{reg}(0) + \varepsilon \\ &= R_{1,P}(0) + \varepsilon \leq 2(L_1(1, 0, \lambda_1) + L_1(-1, 0, \lambda_1)). \end{aligned}$$

The regularization term  $\Omega$  is bounded for  $f_{1,\varepsilon}$ , and there exists  $\delta_1 > 0$  such that  $\|f_{1,\varepsilon}\|_H \leq \delta_1$ . By the Eberlein-Smulyan theorem and the Bolzano-Weierstrass theorem, there exist  $f_{1,P,c_1} \in \delta_1 B_H$ ,  $b \in [0, \delta_1]$  and a sequence  $(f_{1,\varepsilon_m})$  such that

---

W.X. Xu

School of Information Management, Shanghai Lixin University of Accounting and Finance, Shanghai 201209, China  
E-mail: 20190092@lixin.edu.cn

D.J. Huang

School of Data Science and Engineering, East China Normal University, Shanghai 200062, China  
E-mail: djhuang@dase.ecnu.edu.cn

S.G. Zhou

School of Computer Science and Shanghai Key Lab of Intelligent Information Processing, Fudan University, Shanghai 200433, China  
E-mail: sgzhou@fudan.edu.cn

$\|f_{1,\varepsilon_m}\|_H \rightarrow b$  and  $f_{1,\varepsilon_m} \rightarrow f_{1,P,c_1}$  weakly with  $m$  tending to infinity. Considering the continuity of  $L_1$  and the reproducing property of  $H$ , we have

$$L_1(y, f_{1,\varepsilon_m}(x), \lambda_1) \longrightarrow L_1(y, f_{1,P,c_1}(x), \lambda_1)$$

with  $m$  tending to infinity for any  $(x, y) \in X \times Y$ . Taking the expectation on both sides, it derives that

$$R_{1,P}(f_{1,\varepsilon_m}) \longrightarrow R_{1,P}(f_{1,P,c_1}). \quad (1)$$

Then for any  $\rho > 0$ , there exists  $m_0$  such that for any  $m > m_0$  we have  $\varepsilon_m \leq \rho$  and

$$\begin{aligned} R_{1,P}(f_{1,P,c_1}) + \Omega(c_1, \|f_{1,\varepsilon_m}\|_H) - \rho &\leq R_{1,P}(f_{1,\varepsilon_m}) + \Omega(c_1, \|f_{1,\varepsilon_m}\|_H) \\ &\leq R_{1,P}(f_{1,P,c_1}) + \Omega(c_1, \|f_{1,P,c_1}\|_H) + \varepsilon_m. \end{aligned}$$

For the arbitrary smallness of  $\rho$ , it indicates that

$$\lim_{m \rightarrow \infty} \Omega(c_1, \|f_{1,\varepsilon_m}\|_H) \leq \Omega(c_1, \|f_{1,P,c_1}\|_H).$$

On the other hand, according to Corollary 2.6 in [2] we have

$$\|f_{1,P,c_1}\|_H \leq \liminf_{m \rightarrow \infty} \|f_{1,\varepsilon_m}\|_H = b.$$

Then, it concludes that

$$\Omega(c_1, \|f_{1,P,c_1}\|_H) \leq \Omega(c_1, b) = \lim_{m \rightarrow \infty} \Omega(c_1, \|f_{1,\varepsilon_m}\|_H).$$

Therefore, it derives from Eq. (1) that

$$R_{1,P,c_1}^{reg}(f_{1,\varepsilon_m}) \longrightarrow R_{1,P,c_1}^{reg}(f_{1,P,c_1}), \quad m \rightarrow \infty.$$

Since the construction of  $f_{1,\varepsilon_m}$  yields the relationship

$$R_{1,P,c_1}^{reg}(f_{1,\varepsilon_m}) \longrightarrow \inf_{f_1 \in H} R_{1,P,c_1}^{reg}(f_1), \quad m \rightarrow \infty,$$

we have the following equaiton

$$R_{1,P,c_1}^{reg}(f_{1,P,c_1}) = \inf_{f_1 \in H} R_{1,P,c_1}^{reg}(f_1).$$

Moreover, considering the definition of  $\delta_{c_1}$ , it is obvious that  $\delta_{c_1} \geq \delta_1$  and that  $\|f_{1,P,c_1}\|_H \leq b \leq \delta_1 \leq \delta_{c_1}$ , which completes the proof of the first part of the theorem. Since the loss functions  $L_1$  and  $L_2$  are constructed in a symmetric way, we would have the symmetric results

$$R_{2,P,c_2}^{reg}(f_{2,P,c_2}) = \inf_{f_2 \in H} R_{2,P,c_2}^{reg}(f_2), \quad \|f_{2,P,c_2}\|_H \leq \delta_{c_2}.$$

The theorem has been proven.

## 1.2 Proof of Lemma 1

*Proof* Since  $R_{1,P}$  and  $R_{2,P}$  are constructed in a symmetric way, the results for  $R_{1,P}$  and  $R_{2,P}$  could be derived in a symmetric way. Here we only need to get the result for  $R_{1,P}$ . Let  $(\alpha_i)$  be a dense sequence in  $[0, 1]$  with  $\alpha_1 = 0$  and  $\alpha_i \neq \alpha_j$  if  $i \neq j$ . Let  $t_i$  be the solution of

$$C_1(\alpha, t_\alpha, \lambda_1) = \min_{t \in \mathbb{R}} C_1(\alpha, t, \lambda_1), \quad (2)$$

for each  $\alpha_i, i \geq 1$ . Let

$$\begin{aligned} f_{1,m}(\alpha) &:= \min\{t_1, \dots, t_m\}, \\ \hat{f}_1(\alpha) &= \liminf_{m \rightarrow \infty} f_{1,m}(\alpha). \end{aligned}$$

Select a real number  $\hat{\alpha} \in (0, 1)$  at which  $M_1$  is continuous. There exist two subsequences  $(\alpha_{i_j})$  and  $(t_{i_j})$  such that  $(\alpha_{i_j}) \rightarrow \hat{\alpha}$  and  $(t_{i_j}) \rightarrow \hat{f}_1(\hat{\alpha})$  with  $j$  tending to infinity. It follows from the continuity of  $L_1$  that

$$\begin{aligned} M_1(\hat{\alpha}, \lambda_1) &= \lim_{j \rightarrow \infty} M_1(\alpha_{i_j}, \lambda_1) \\ &= \lim_{j \rightarrow \infty} [\alpha_{i_j} L_1(1, t_{i_j}, \lambda_1) + (1 - \alpha_{i_j}) L_1(-1, t_{i_j}, \lambda_1)] \\ &= \hat{\alpha} L_1(1, \hat{f}_1(\hat{\alpha}), \lambda_1) + (1 - \hat{\alpha}) L_1(-1, \hat{f}_1(\hat{\alpha}), \lambda_1), \end{aligned}$$

which implies that  $\hat{f}_1(\hat{\alpha})$  is a solution of Eq. (2) for  $\hat{\alpha}$ . Since  $M_1$  is concave, it is also continuous for all but at most countably many points of  $[0, 1]$  by Theorem 1.16 in [4]. Then in order to construct  $f_1^*$  such that  $M_1$  is continuous for all points, we only have to modify  $\hat{f}_1$  on the countably many points. Therefore,

$$\begin{aligned} R_{1,P} &= \inf\{R_{1,P}(f_1) | f_1 : X \rightarrow \mathbb{R} \text{ measurable}\} \\ &= \inf_{f_1} \int_{(x,y) \sim P} L_1(y, f_1(x), \lambda_1) dP(x, y) \\ &= \inf_{f_1} \int_X [P(1|x) L_1(1, f_1(x), \lambda_1) + (1 - P(1|x)) L_1(-1, f_1(x), \lambda_1)] P_X(dx) \\ &= \inf_{f_1} \int_X C_1(P(1|x), f_1(x), \lambda_1) P_X(dx) = \int_X M_1(f_1^*(P(1|x)), \lambda_1) P_X(dx). \end{aligned}$$

The lemma has been proven.

## 1.3 Proof of Theorem 2

*Proof* Since  $R_{1,P}$  and  $R_{2,P}$  are constructed in a symmetric way, the results for  $R_{1,P}$  and  $R_{2,P}$  could be derived in a symmetric way. Here we only need to get the result for  $R_{1,P}$ .

By the definition of infimum, there exists  $f_{1,\varepsilon} \in H$  such that

$$R_{1,P}(f_{1,\varepsilon}) \leq \inf_{f_1 \in H} R_{1,P}(f_1) + \varepsilon$$

for any  $\varepsilon > 0$ . Since the regularization term  $\Omega(\cdot, \|f_{1,\varepsilon}\|_H)$  is continuous in 0, there exists  $\hat{c}_1$  such that for any  $c_1 < \hat{c}_1$  we have  $\Omega(c_1, \|f_{1,\varepsilon}\|_H) \leq \varepsilon$ . It follows from Theorem 1 that

$$\lim_{c_1 \rightarrow 0} R_{1,P,c_1}^{reg}(f_{1,P,c_1}) = \lim_{c_1 \rightarrow 0} \inf_{f_1 \in H} R_{1,P,c_1}^{reg}(f_1) = \inf_{f_1 \in H} R_{1,P}(f_1).$$

In order to prove the theorem, it suffice to give the proof that

$$\inf_{f_1 \in H} R_{1,P}(f_1) = \inf\{R_{1,P}(f_1) : f_1 \in L_\infty(P_X)\} = R_{1,P}. \quad (3)$$

Since  $k$  is a universal kernel, for any  $\epsilon, \delta > 0$  and any bounded measurable function  $h : X \rightarrow \mathbb{R}$ , there exists  $f_1 \in H$  such that

$$\begin{aligned} P_X(\{x \in X : |h(x) - f_1(x)| \geq \epsilon\}) &\leq \delta, \\ \|f_1\|_\infty &\leq \|h\|_\infty \in L_\infty(P_X). \end{aligned}$$

Since  $L_1$  is uniformly continuous on  $Y \times [-\|h\|_\infty, \|h\|_\infty]$ , the first equality of Eq. (3) is valid.

Now we begin to show the validity for the last equality of Eq. (3). Define two functions  $f_{1,m} : [0, 1] \rightarrow \mathbb{R}$  and  $M_{1,m}(\alpha, \lambda_1)$  as follows:

$$\begin{aligned} f_{1,m}(\alpha) &= \begin{cases} f_1^*(\alpha), & |f_1^*(\alpha)| \leq m, \\ 0, & \text{otherwise,} \end{cases} \\ M_{1,m}(\alpha, \lambda_1) &= \alpha L_1(1, f_{1,m}(\alpha), \lambda_1) + (1 - \alpha)L_1(-1, f_{1,m}(\alpha), \lambda_1), \end{aligned}$$

where  $f_1^*$  is constructed as in Lemma 1. For any  $\alpha \in [0, 1]$  with  $|f_1^*(\alpha)| < \infty$ , we have

$$\begin{aligned} M_{1,m}(\alpha, \lambda_1) &= \mathbf{1}_{[-m,m]}(f_1^*(\alpha))M_1(\alpha, \lambda_1) \\ &\quad + \mathbf{1}_{\mathbb{R} \setminus [-m,m]}(f_1^*(\alpha))(\alpha L_1(1, 0, \lambda_1) + (1 - \alpha)L_1(-1, 0, \lambda_1)). \end{aligned}$$

Moreover as  $m$  tends to infinity,  $M_{1,m}(\alpha, \lambda_1)$  is monotonically decreasing bounded in  $M_1(\alpha, \lambda_1)$  with respect to  $\alpha$ , according to the definition of  $M_1(\alpha, \lambda_1)$ , i.e.,

$$|M_{1,m}(\alpha, \lambda_1) - M_1(\alpha, \lambda_1)| \rightarrow 0.$$

Therefore, it derives from Lemma 1 that

$$\begin{aligned} R_{1,P} &= \int_X M_1(P(1|x), \lambda_1) P_X(dx) \\ &= \lim_{m \rightarrow \infty} \int_X M_{1,m}(P(1|x), \lambda_1) P_X(dx) \\ &= \inf\{R_{1,P}(h) | h : X \rightarrow \mathbb{R} \text{ bounded, measurable}\}. \end{aligned}$$

The theorem has been proven.

#### 1.4 Proof of Theorem 3

*Proof* The set of points misclassified by  $f$  is defined as

$$E_f := \{x \in X : P(1|x) < \frac{1}{2}, f(x) > 0\} \cup \{x \in X : P(1|x) > \frac{1}{2}, f(x) < 0\}.$$

Given a measurable functions  $f_1^* : [0, 1] \rightarrow \mathbb{R}$  according to Lemma 1, we have

$$\begin{aligned} \delta_1 &\geq R_{1,P}(f_1) - R_{1,P} \\ &= \int_{X \setminus E_f} C_1(P(1|x), f_1(x), \lambda_1) P_X(dx) + \int_{E_f} C_1(P(1|x), f_1(x), \lambda_1) P_X(dx) \\ &\quad - \int_{X \setminus E_f} C_1(P(1|x), f_1^*(P(1|x)), \lambda_1) P_X(dx) \\ &\quad - \int_{E_f} C_1(P(1|x), f_1^*(P(1|x)), \lambda_1) P_X(dx) \\ &\geq \int_{E_f} C_1(P(1|x), f_1(P(1|x)), \lambda_1) P_X(dx) - \int_{E_f} M_1(P(1|x), \lambda_1) P_X(dx). \end{aligned}$$

In order to estimate the first term on the right-hand side, define a novel function  $\tilde{f}_1 : [0, 1] \rightarrow \mathbb{R}$  such that

$$C_1(\alpha, \tilde{f}_1(\alpha), \lambda_1) = \begin{cases} \inf\{C_1(\alpha, t, \lambda_1) : t \geq 0\}, & \alpha < \frac{1}{2}, \\ \inf\{C_1(\alpha, t, \lambda_1) : t \leq 0\}, & \alpha > \frac{1}{2}. \end{cases}$$

Note,  $\tilde{f}_1$  is assumed to be measurable by the technique in the proof of Lemma 1. Since  $L_1$  is admissible, we have  $C_1(\alpha, \tilde{f}_1(\alpha), \lambda_1) - M_1(\alpha, \lambda_1) > 0$  for any  $\alpha \in [0, 1] \setminus \{1/2\}$ . Indeed, for  $\alpha < 1/2$ , we have  $t_\alpha < 0$ , implying that

$$C_1(\alpha, \tilde{f}_1(\alpha), \lambda_1) = \inf\{C_1(\alpha, t, \lambda_1) : t \geq 0\} > C_1(\alpha, t_\alpha, \lambda_1) = M_1(\alpha, \lambda_1).$$

For  $\alpha > 1/2$ , we have  $t_\alpha > 0$ , implying that

$$C_1(\alpha, \tilde{f}_1(\alpha), \lambda_1) = \inf\{C_1(\alpha, t, \lambda_1) : t \leq 0\} > C_1(\alpha, t_\alpha, \lambda_1) = M_1(\alpha, \lambda_1).$$

Define  $\Delta_1 : X \rightarrow \mathbb{R}$  as follows:

$$\Delta_1(x) = C_1(P(1|x), \tilde{f}_1(P(1|x)), \lambda_1) - M_1(P(1|x), \lambda_1).$$

$\Delta_1$  is a strictly positive function on  $\hat{X} := \{x \in X : P(1|x) \neq 1/2\}$ , thus

$$0 < \int_{E_f} \Delta_1(x) dx \leq \delta_1.$$

Similarly, we could get another symmetric result

$$0 < \int_{E_f} \Delta_2(x) dx \leq \delta_2$$

for function  $\Delta_2 : X \rightarrow \mathbb{R}$  as follows:

$$\Delta_2(x) = C_2(P(1|x), \tilde{f}_2(P(1|x)), \lambda_2) - M_2(P(1|x), \lambda_2).$$

As  $\delta_1, \delta_2$  tends to 0, it derives that  $P\{x \in E_f\} \rightarrow 0$ . Note, Theorem 2.6 in [3] indicates that

$$R_P(f) - R_P = \int_{E_f} (1 - 2\eta(x))P_X(dx),$$

where  $\eta(x) = \min\{P(1|x), P(-1|x)\}$ . The function  $1 - 2\eta(x)$  is also strictly positive on  $\tilde{X}$ . Thus, the equation  $R_P(f) - R_P \rightarrow 0$  holds true. The theorem has been proven.

### 1.5 Proof of Lemma 2

*Proof* Since the hyper-planes  $f_1$  and  $f_2$  are constructed in a symmetric way, the results for  $f_1$  and  $f_2$  could also be derived in a similar way. We only need to get the result for  $f_1$ .

Denote  $\mathcal{F}_1 = \{L_1(\cdot, f_1(\cdot), \lambda_1) : f_1 \in \delta_{c_1}I(B_H)\}$ . Let  $\{f_1^1, \dots, f_1^n\}$  be the  $\epsilon$ -net of  $\delta_{c_1}I(B_H)$ . Then  $\{f_1^1, \dots, f_1^n\}$  is shown to be the  $w(L_{1,c_1}, \epsilon)$ -net of  $\mathcal{F}_1$  by virtue of the definition of the modulus of continuity. Thus, suppose there exists a minimal  $w^{-1}(L_{1,c_1}, \epsilon)$ -net for  $\delta_{c_1}I(B_H)$ , then there exists a  $\epsilon$ -net for  $\mathcal{F}_1$  by virtue of the definition of the modulus of continuity. Therefore,  $\mathcal{N}(\mathcal{F}_1, \epsilon) \leq \mathcal{N}(\delta_{c_1}I, w^{-1}(L_{1,c_1}, \epsilon))$ . Since  $\mathcal{F}_1$  is a subset of nonnegative functions that are bounded by  $\|L_{1,c_1}\|_\infty$ , it follows from Hoeffding's inequality for Theorem 8.1 in [3] that

$$\begin{aligned} & Pr\left\{S : \sup_{f_1 \in \delta_{c_1}I(B_H)} |R_{1,S}(f_1) - R_{1,P}(f_1)| \geq \epsilon\right\} \\ & \leq 2\mathcal{N}(\mathcal{F}_1, \epsilon/3) \exp\left\{-\frac{2\epsilon^2 m}{9\|L_{1,c_1}\|_\infty^2}\right\} \\ & \leq 2 \exp\left\{\mathcal{H}(\delta_{c_1}I, \omega^{-1}(L_{1,c_1}, \epsilon/3)) - \frac{2\epsilon^2 m}{9\|L_{1,c_1}\|_\infty^2}\right\}. \end{aligned}$$

Since Theorem 1 guarantees that  $f_{1,S,c_1} \in \delta_{c_1}I(B_H)$ , we have

$$\begin{aligned} & Pr\{S : |R_{1,S}(f_{1,S,c_1}) - R_{1,P}(f_{1,S,c_1})| \geq \epsilon\} \\ & \leq Pr\left\{S : \sup_{f_1 \in \delta_{c_1}I(B_H)} |R_{1,S}(f_1) - R_{1,P}(f_1)| \geq \epsilon\right\} \\ & \leq 2 \exp\left\{\mathcal{H}(\delta_{c_1}I, \omega^{-1}(L_{1,c_1}, \epsilon/3)) - \frac{2\epsilon^2 m}{9\|L_{1,c_1}\|_\infty^2}\right\}. \end{aligned}$$

The lemma has been proven.

## 1.6 Proof of Theorem 4

*Proof* Define a variable

$$g_1 := \sup\{|L_1(y, t, \lambda_1) - L_1(y, t', \lambda_1)| : y \in Y, t, t' \in [-\hat{\delta}_1 K, \hat{\delta}_1 K]\}.$$

Let  $\epsilon \in (0, g_1)$ , and fix  $\delta_1$  as in Theorem 3 satisfying  $R_{1,P}(f_1) \leq R_{1,P} + \delta_1$  for any measurable function  $f_1 : X \rightarrow \mathbb{R}$ . Applying Theorem 2, there exists  $m_0 \in \mathbb{N}$  such that for any  $m > m_0$ , we have

$$|R_{1,P,c_1(m)}^{reg}(f_{1,P,c_1(m)}) - R_{1,P}| \leq \delta_1/3.$$

Note, the quantity

$$\sup\{w^{-1}(L_{1,c_1(m)}, \epsilon) : c_1(m) \in (0, 1], \epsilon \in (0, g_1)\} < \infty$$

ensures that there exists  $\rho_1$  such that for any  $m > m_0$ , we have

$$\mathcal{H}(\delta_{c_1(m)} I, w^{-1}(L_{1,c_1(m)}, \epsilon)) \geq \rho_1,$$

i.e., there are at least two points to cover  $\delta_{c_1(m)} I(B_H)$ . Thus it follows from the condition on  $c_1(m)$  that

$$\begin{aligned} \frac{\|L_{1,c_1(m)}\|_\infty^2}{m} &\longrightarrow 0, \quad m \longrightarrow \infty \\ \exp\left\{\mathcal{H}(\delta_{c_1(m)} I, w^{-1}(L_{1,c_1(m)}, \epsilon/3)) - \frac{2\epsilon^2 m}{9\|L_{1,c_1(m)}\|_\infty^2}\right\} &\longrightarrow 0, \quad m \longrightarrow \infty. \end{aligned}$$

Using Lemma 2 together with Hoeffding's inequality, we have

$$\begin{aligned} Pr\left\{S : |R_{1,S}(f_{1,S,c_1(m)}) - R_{1,P}(f_{1,S,c_1(m)})| > \frac{\delta_1}{3}\right. \\ \left. \cup |R_{1,S}(f_{1,P,c_1(m)}) - R_{1,P}(f_{1,P,c_1(m)})| > \frac{\delta_1}{3}\right\} \leq \epsilon, \end{aligned}$$

for any  $m > m_0$ . Furthermore,

$$\begin{aligned} R_{1,P}(f_{1,S,c_1(m)}) &\leq \Omega(c_1(m), \|f_{1,S,c_1(m)}\|_H) + R_{1,P}(f_{1,S,c_1(m)}) \\ &\leq \Omega(c_1(m), \|f_{1,S,c_1(m)}\|_H) + R_{1,S}(f_{1,S,c_1(m)}) + \delta_1/3 \\ &\leq \Omega(c_1(m), \|f_{1,P,c_1(m)}\|_H) + R_{1,S}(f_{1,P,c_1(m)}) + \delta_1/3 \\ &\leq \Omega(c_1(m), \|f_{1,P,c_1(m)}\|_H) + R_{1,P}(f_{1,P,c_1(m)}) + 2\delta_1/3 \\ &\leq R_{1,P} + \delta_1. \end{aligned}$$

Since the hyper-planes  $f_1$  and  $f_2$  are constructed in a symmetric way, the results for  $f_1$  and  $f_2$  could be derived in a similar way. Analogously, we have the result

$$R_{2,P}(f_{2,S,c_2(m)}) \leq R_{2,P} + \delta_2,$$

where  $c_2(m)$  is defined the same as  $c_1(m)$  and  $\delta_2$  is defined as in Theorem 3. It concludes from Theorem 3 that  $R_P(f_S) \leq R_P + \epsilon$ , where  $f_S(\cdot) = |f_{2,S,c_2(m)}(\cdot)| -$

$|f_{1,S,c_1(m)}(\cdot)|$ , implying the optimal problem Eq. (3) (in the main paper) is universally consistent.

Now we start to show the strongly universal consistency. The conditions

$$\begin{aligned} \sum_{m=1}^{\infty} \exp\{-\epsilon m / \|L_{1,c_1(m)}\|_{\infty}^2\} < \infty, \\ \sum_{m=1}^{\infty} \exp\{-\epsilon m / \|L_{2,c_2(m)}\|_{\infty}^2\} < \infty, \end{aligned} \quad (4)$$

ensure that

$$\begin{aligned} \exp\{-\epsilon m / \|L_{1,c_1(m)}\|_{\infty}^2\} &\longrightarrow 0, \quad m \longrightarrow \infty, \\ \exp\{-\epsilon m / \|L_{2,c_2(m)}\|_{\infty}^2\} &\longrightarrow 0, \quad m \longrightarrow \infty. \end{aligned}$$

Furthermore,

$$\begin{aligned} \exp\left\{\mathcal{H}(\delta_{c_1} I, \omega^{-1}(L_{1,c_1}, \epsilon/3)) - \frac{2\epsilon^2 m}{9\|L_{1,c_1}\|_{\infty}^2}\right\} &\longrightarrow 0, \quad m \longrightarrow \infty, \\ \exp\left\{\mathcal{H}(\delta_{c_2} I, \omega^{-1}(L_{2,c_2}, \epsilon/3)) - \frac{2\epsilon^2 m}{9\|L_{2,c_2}\|_{\infty}^2}\right\} &\longrightarrow 0, \quad m \longrightarrow \infty. \end{aligned}$$

Thus the optimal problem is strongly universally consistent.

### 1.7 Proof of Lemma 3

*Proof* Since the hyper-planes  $f_1$  and  $f_2$  are constructed in a symmetric way, the results for  $f_1$  and  $f_2$  could be derived in a similar way. We only need to get the result for  $f_1$ .

Denote  $\mathcal{F}_1 = \{L_1(\cdot, f(\cdot), \lambda_1) : f \in \delta_{c_1} I(B_H)\}$ . As discussed in the proof of Lemma 2, it derives for localized covering number that

$$\mathcal{N}(\mathcal{F}_1, 2m, \epsilon) \leq \mathcal{N}(\delta_{c_1} I, 2m, \omega^{-1}(L_{1,c_1}, \epsilon)).$$

It follows from Lemma 3.4 in [1] that

$$\begin{aligned} &Pr\left\{S : \sup_{f_1 \in \delta_{c_1} I(B_H)} |R_{1,S}(f_1) - R_{1,P}(f_1)| \geq \epsilon\right\} \\ &\leq 12m \mathcal{N}(\mathcal{F}_1, 2m, \epsilon/6) \exp\left\{-\frac{\epsilon^2 m}{36\|L_{1,c_1}\|_{\infty}^2}\right\} \\ &\leq 12m \exp\left\{\mathcal{H}(\delta_{c_1} I, 2m, \omega^{-1}(L_{1,c_1}, \epsilon/6)) - \frac{\epsilon^2 m}{36\|L_{1,c_1}\|_{\infty}^2}\right\}. \end{aligned}$$

Since Lemma 1 guarantees that  $f_{1,S,c_1} \in \delta_{c_1} I(B_H)$ , we have

$$\begin{aligned} &Pr\left\{S : |R_{1,S}(f_{1,S,c_1}) - R_{1,P}(f_{1,S,c_1})| \geq \epsilon\right\} \\ &\leq 12m \exp\left\{\mathcal{H}(\delta_{c_1} I, 2m, \omega^{-1}(L_{1,c_1}, \epsilon/6)) - \frac{\epsilon^2 m}{36\|L_{1,c_1}\|_{\infty}^2}\right\}. \end{aligned}$$

The lemma has been proven.



## 1.8 Proof of Theorem 5

*Proof* Let  $g_1$ ,  $\epsilon$ ,  $\delta_1$  and  $m_0$  be defined the same as that in the proof of Theorem 4. Note that, the quantity

$$\sup\{w^{-1}(L_{1,c_1(m)}, \epsilon) : c_1(m) \in (0, 1], \epsilon \in (0, g_1)\} < \infty$$

ensures there exists  $\rho_1$  such that for any  $m > m_0$ , we have

$$\mathcal{H}(\delta_{c_1(m)}I, 2m, w^{-1}(L_{1,c_1(m)}, \epsilon)) \geq \rho_1,$$

i.e., there are at least two points to cover  $\delta_{c_1(m)}I(B_H)$ . Thus, it follows from the condition on  $c_1(m)$  that

$$\begin{aligned} \frac{\|L_{1,c_1(m)}\|_\infty^2}{m} &\longrightarrow 0, \quad m \longrightarrow \infty, \\ \exp\left\{\mathcal{H}(\delta_{c_1}I, 2m, \omega^{-1}(L_{1,c_1}, \epsilon/6)) - \frac{\epsilon^2 m}{36\|L_{1,c_1}\|_\infty^2}\right\} &\longrightarrow 0, \quad m \longrightarrow \infty. \end{aligned}$$

Using Lemma 3 together with Hoeffding's inequality, for any  $m > m_0$  we have

$$\begin{aligned} Pr\left(S : |R_{1,S}(f_{1,S,c_1(m)}) - R_{1,P}(f_{1,S,c_1(m)})| > \delta_1/3 \right. \\ \left. \cup |R_{1,S}(f_{1,P,c_1(m)}) - R_{1,P}(f_{1,P,c_1(m)})| > \delta_1/3\right) \leq \epsilon. \end{aligned}$$

According to the procedures in the proof of Theorem 4, it derives that

$$R_{1,P}(f_{1,S,c_1(m)}) \leq R_{1,P} + \delta_1,$$

Analogously, we have the result for  $f_{2,S,c_2(m)}$  that

$$R_{2,P}(f_{2,S,c_2(m)}) \leq R_{2,P} + \delta_2,$$

where  $c_2(m)$  and  $\delta_2$  are defined the same as  $c_1(m)$  and  $\delta_1$ . It yields by Theorem 3 that  $R_P(f_S) \leq R_P + \epsilon$ , where  $f_S(\cdot) = |f_{2,S,c_2(m)}(\cdot)| - |f_{1,S,c_1(m)}(\cdot)|$ , implying the optimal problem Eq. (3) (in the main paper) is universally consistent.

Now we start to show the strongly universal consistency. The conditions

$$\begin{aligned} \sum_{m=1}^{\infty} \exp\{-\epsilon m / \|L_{1,c_1(m)}\|_\infty^2\} &< \infty, \\ \sum_{m=1}^{\infty} \exp\{-\epsilon m / \|L_{2,c_2(m)}\|_\infty^2\} &< \infty, \end{aligned}$$

ensures that

$$\begin{aligned} \exp\left\{\mathcal{H}(\delta_{c_1}I, 2m, \omega^{-1}(L_{1,c_1}, \epsilon/6)) - \frac{\epsilon^2 m}{36\|L_{1,c_1}\|_\infty^2}\right\} &\longrightarrow 0, \quad m \longrightarrow \infty, \\ \exp\left\{\mathcal{H}(\delta_{c_2}I, 2m, \omega^{-1}(L_{2,c_2}, \epsilon/6)) - \frac{\epsilon^2 m}{36\|L_{2,c_2}\|_\infty^2}\right\} &\longrightarrow 0, \quad m \longrightarrow \infty. \end{aligned}$$

Thus, the optimal problem is strongly universally consistent.

## 1.9 Proof of Lemma 4

*Proof* Since the lemma is valid for differentiable loss functions by virtue of Theorem 12.4 in [6], we only consider the lemma for non-differentiable loss functions below. The idea of the proof mainly follows the approach of [8].

Let  $\hat{S} = S_{i,(x,y)}$  for some fixed  $i = 1, \dots, m$ . Let  $E_S f$  be the expectation of  $f$  with respect to the empirical measure induced by  $S$ . Recall for a convex, continuous function  $f_1 : X \rightarrow \mathbb{R}$ , the sub-differential of  $f_1$  in  $x \in X$  is defined by

$$\partial f_1(x) := \{x^* \in X : \langle x^*, x' - x \rangle \leq f_1(x') - f_1(x), \forall x' \in X\}.$$

The convexity of  $L_1$  implies that  $L_{1,c_1(m)}$  is locally 1-Hölder-continuous. Actually, we only have to consider the case for finite dimensional subspaces of  $H$ . Theorem 23.8 and 23.9 in [5] show that

$$R_{1,S,c_1(m)}^{reg}(f_1) = 2c_1(m)f_1 + D,$$

where

$$D = \{E_S h\Phi : h(x_i, y_i) \in \partial L_1(y_i, f_1(x_i), \lambda_1), \forall i = 1, \dots, m\},$$

and the sub-differential  $\partial L_1$  is only with respect to the second variable of  $L_1$ . Since  $f_{1,S,c_1(m)}$  is the element minimizing  $R_{1,S,c_1(m)}^{reg}$ , and  $0 \in \partial R_{1,S,c_1(m)}^{reg}(f_{1,S,c_1(m)})$ , there exists  $h(x_i, y_i) \in \partial L_1(y_i, f_{1,S,c_1(m)}(x_i), \lambda_1)$ ,  $i = 1, \dots, m$ , such that

$$0 \leq 2c_1(m)f_{1,S,c_1(m)} + E_S h\Phi = R_{1,S,c_1(m)}^{reg}(f_{1,S,c_1(m)}) \leq R_{1,S,c_1(m)}^{reg}(0) = 0.$$

Note,  $f_{1,S,c_1(m)}$  has an upper bound by virtue of the proof of Lemma 1. It follows from the Lipschitz continuity of  $L_{1,c_1(m)}$  that  $\|h\|_\infty \leq |L_{1,c_1(m)}|_1$ . Thus,

$$\begin{aligned} & h(x_i, y_i)(f_{1,\hat{S},c_1(m)}(x_i) - f_{1,S,c_1(m)}(x_i)) \\ & \leq L_1(y_i, f_{1,\hat{S},c_1(m)}(x_i), \lambda_1) - L_1(y_i, f_{1,S,c_1(m)}(x_i), \lambda_1), i = 1, \dots, m. \end{aligned}$$

Taking expectation with respect to the empirical measure of  $\hat{S}$  on both sides, it derives

$$\begin{aligned} & \langle f_{1,\hat{S},c_1(m)} - f_{1,S,c_1(m)}, E_{\hat{S}} h\Phi \rangle \\ & \leq E_{\hat{S}} L_1(\cdot, f_{1,\hat{S},c_1(m)}(\cdot), \lambda_1) - E_{\hat{S}} L_1(\cdot, f_{1,S,c_1(m)}(\cdot), \lambda_1), \end{aligned}$$

for the reproducing property of  $\Phi$ . Since

$$\begin{aligned} & \|f_{1,S,c_1(m)}\|^2 + 2 \langle f_{1,\hat{S},c_1(m)} - f_{1,S,c_1(m)}, f_{1,S,c_1(m)} \rangle + \|f_{1,S,c_1(m)} - f_{1,\hat{S},c_1(m)}\|^2 \\ & = \|f_{1,\hat{S},c_1(m)}\|^2, \end{aligned}$$

we have

$$\begin{aligned}
 & R_{1, \hat{S}, c_1(m)}^{reg}(f_{1, S, c_1(m)}) + c_1(m) \|f_{1, S, c_1(m)} - f_{1, \hat{S}, c_1(m)}\|^2 \\
 & + \langle f_{1, \hat{S}, c_1(m)} - f_{1, S, c_1(m)}, E_{\hat{S}} h \Phi + 2c_1(m) f_{1, S, c_1(m)} \rangle \\
 = & E_{\hat{S}} L_1(\cdot, f_{1, S, c_1(m)}(\cdot), \lambda_1) + c_1(m) \|f_{1, S, c_1(m)}\|^2 \\
 & + c_1(m) \|f_{1, S, c_1(m)} - f_{1, \hat{S}, c_1(m)}\|^2 + \langle f_{1, \hat{S}, c_1(m)} - f_{1, S, c_1(m)}, E_{\hat{S}} h \Phi \rangle \\
 & + 2c_1(m) \langle f_{1, \hat{S}, c_1(m)} - f_{1, S, c_1(m)}, f_{1, S, c_1(m)} \rangle \\
 = & E_{\hat{S}} L_1(\cdot, f_{1, S, c_1(m)}(\cdot), \lambda_1) + \langle f_{1, \hat{S}, c_1(m)} - f_{1, S, c_1(m)}, E_{\hat{S}} h \Phi \rangle + \|f_{1, \hat{S}, c_1(m)}\|^2 \\
 \leq & E_{\hat{S}} L_1(\cdot, f_{1, \hat{S}, c_1(m)}(\cdot), \lambda_1) + \|f_{1, \hat{S}, c_1(m)}\|^2 \\
 = & R_{1, \hat{S}, c_1(m)}^{reg}(f_{1, \hat{S}, c_1(m)}).
 \end{aligned}$$

Since  $f_{1, \hat{S}, c_1(m)}$  minimizes  $R_{1, \hat{S}, c_1(m)}^{reg}$ , it follows that

$$R_{1, \hat{S}, c_1(m)}^{reg}(f_{1, S, c_1(m)}) \geq R_{1, \hat{S}, c_1(m)}^{reg}(f_{1, \hat{S}, c_1(m)}).$$

Thus, we have

$$\begin{aligned}
 & c_1(m) \|f_{1, S, c_1(m)} - f_{1, \hat{S}, c_1(m)}\|^2 \\
 \leq & \langle f_{1, S, c_1(m)} - f_{1, \hat{S}, c_1(m)}, E_{\hat{S}} h \Phi + 2c_1(m) f_{1, S, c_1(m)} \rangle \\
 = & \|f_{1, S, c_1(m)} - f_{1, \hat{S}, c_1(m)}\| \|E_{\hat{S}} h \Phi + 2c_1(m) f_{1, S, c_1(m)}\|.
 \end{aligned}$$

Furthermore, we have

$$\|f_{1, S, c_1(m)} - f_{1, \hat{S}, c_1(m)}\| \leq \frac{1}{c_1(m)} \|E_{\hat{S}} h \Phi - E_S h \Phi\| \leq \frac{2K |L_{1, c_1(m)}|_1}{m c_1(m)}.$$

Therefore,

$$\begin{aligned}
 & |L_1(\cdot, f_{1, S, c_1(m)}(\cdot), \lambda_1) - L_1(\cdot, f_{1, \hat{S}, c_1(m)}(\cdot), \lambda_1)| \\
 \leq & K |L_{1, c_1(m)}|_1 \|f_{1, S, c_1(m)} - f_{1, \hat{S}, c_1(m)}\| \\
 = & \frac{2K^2 |L_{1, c_1(m)}|_1^2}{m c_1(m)}.
 \end{aligned}$$

Since the hyper-planes  $f_1$  and  $f_2$  are constructed in a symmetric way, the results for  $f_1$  and  $f_2$  could be derived in a similar way. Thus,

$$|L_2(\cdot, f_{2, S, c_2(m)}(\cdot), \lambda_2) - L_2(\cdot, f_{2, \hat{S}, c_2(m)}(\cdot), \lambda_2)| \leq \frac{2K^2 |L_{2, c_2(m)}|_1^2}{m c_2(m)}.$$

The above two inequalities satisfy the definition of stability for the optimal problem Eq. (3) (in the main paper). The lemma has been proven.

## 1.10 Proof of Lemma 5

*Proof* The classifiers  $f_1$  and  $f_2$  are both stable [7] according to the definition of stability for the classifier  $f$ . It follows from Lemma 3.21 in [7] that

$$\begin{aligned} Pr\{S : |R_{1,S}(f_{1,S,c_1}) - R_{1,P}(f_{1,S,c_1})| > \epsilon + \beta_1(m)\} \\ \leq 2 \exp\left\{-\frac{\epsilon^2 m}{2(m\beta_1(m) + \|L_{1,c_1(m)}\|_\infty)^2}\right\}, \\ Pr\{S : |R_{2,S}(f_{2,S,c_2}) - R_{2,P}(f_{2,S,c_2})| > \epsilon + \beta_2(m)\} \\ \leq 2 \exp\left\{-\frac{\epsilon^2 m}{2(m\beta_2(m) + \|L_{2,c_2(m)}\|_\infty)^2}\right\}. \end{aligned}$$

The lemma has been proven.

## 1.11 Proof of Theorem 6

*Proof* By virtue of the definitions of  $\delta_{c_1}$  and  $L_{1,c_1}$ , there exist constants  $a$  and  $b$  such that

$$\|L_{1,c_1(m)}\|_\infty \leq a\delta_{c_1(m)}|L_{1,c_1(m)}|_1, \quad \delta_{c_1(m)} \leq \frac{b}{\sqrt{c_1(m)}},$$

for any  $m \geq 1$  and for the sequence  $(c_1(m))$ . Thus, with  $m$  tending to infinity, we have

$$\frac{\|L_{1,c_1(m)}\|_\infty^2}{\sqrt{m}} \leq \frac{a^2\delta_{c_1(m)}^2|L_{1,c_1(m)}|_1^2}{\sqrt{m}} \leq \frac{a^2b^2|L_{1,c_1(m)}|_1^2}{\sqrt{m}c_1(m)} \rightarrow 0.$$

$\beta_1(m)$  is defined as in Lemma 5. It derives from Lemmas 4 and 5 that

$$\sqrt{m}\beta_1(m) = \frac{\sqrt{m}2K^2|L_{1,c_1(m)}|_1^2}{mc_1(m)} = \frac{2K^2|L_{1,c_1(m)}|_1^2}{\sqrt{m}c_1(m)} \rightarrow 0, \quad m \rightarrow \infty,$$

since  $K$  is a bounded constant. Therefore,

$$\exp\left\{-\frac{\epsilon^2 m}{2(m\beta_1(m) + \|L_{1,c_1(m)}\|_\infty)^2}\right\} \rightarrow 0, \quad m \rightarrow \infty.$$

Fix  $\delta_1 = \epsilon + \beta_1(m)$ , the proof of Theorem 4 yields that

$$R_{1,P}(f_{1,S,c_1(m)}) \leq R_{1,P} + \delta_1.$$

Analogously, we have the result for  $f_{2,S,c_2(m)}$  that

$$R_{2,P}(f_{2,S,c_2(m)}) \leq R_{2,P} + \delta_2$$

where  $c_2(m)$  is defined the same as  $c_1(m)$  and  $\delta_2 = \epsilon + \beta_2(m)$ . It follows from Theorem 3 that  $R_P(f_S) \leq R_P + \epsilon$ , where  $f_S(\cdot) = |f_{2,S,c_2(m)}(\cdot)| - |f_{1,S,c_1(m)}(\cdot)|$ , implying the optimal problem Eq. (3) (in the main paper) is universally consistent.

## References

1. Alon, N., Ben-David, S., Cesa-Bianchi, N., Haussler, D.: Scale-sensitive dimensions, uniform convergence, and learnability. In: 34th Annual Symposium on Foundations of Computer Science, pp. 292–301. IEEE Computer Society (1993)
2. Barbu, V., Precupanu, T.: Convexity and Optimization in Banach Spaces, fourth edn. Springer Monographs in Mathematics. Springer (2012)
3. Devroye, L., Györfi, L., Lugosi, G.: A probabilistic theory of pattern recognition, *Stochastic Modelling and Applied Probability*, vol. 31. Springer (1996)
4. Phelps, R.R.: Convex Functions, Monotone Operators and Differentiability, *Lecture Notes in Mathematics*, vol. 1364. Springer (1993)
5. Rockafellar, R.T.: Convex Analysis, *Princeton Landmarks in Mathematics and Physics*, vol. 36. Princeton University Press (1970)
6. Schölkopf, B., Smola, A.J.: Learning with kernels: support vector machines, regularization, optimization, and beyond. Adaptive computation and machine learning series. MIT Press (2002)
7. Steinwart, I.: Consistency of support vector machines and other regularized kernel classifiers. *IEEE Transactions on Information Theory* **51**(1), 128–142 (2005)
8. Zhang, T.: Convergence of large margin separable linear classification. In: T.K. Leen, T.G. Dietterich, V. Tresp (eds.) *Advances in Neural Information Processing Systems 13*, pp. 357–363. MIT Press (2001)
